# Supplementary material for: Clinical differences and prognostic factors for unfavourable outcome in community-acquired versus health care-associated intracranial empyema and abscess
Source: Research Square preprint supplement (doi:10.21203/rs.3.rs-8357670/v1), 2026-01-13
Supplement: Supplementary file 1 [file 877cf701d5e304616ba8c45b.pdf]

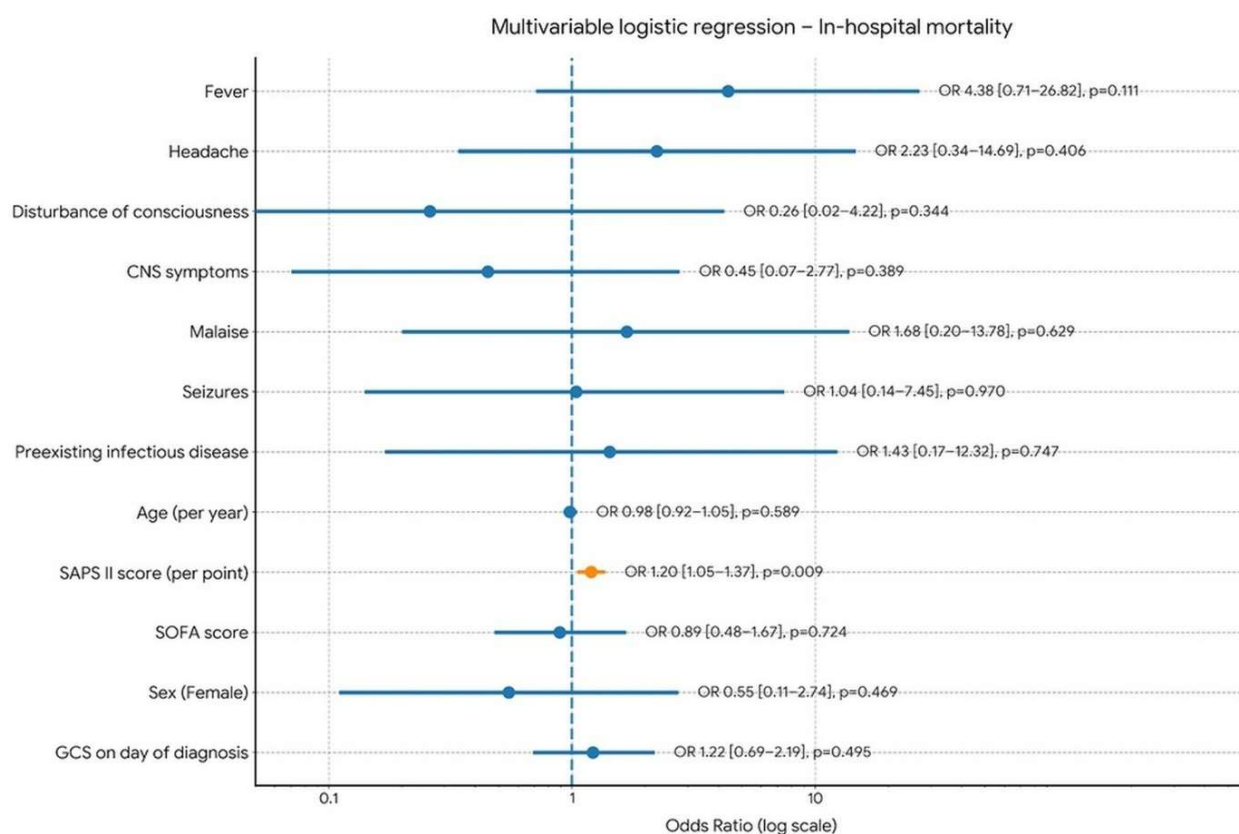

**Fig. S2** Multivariable logistic regression analysis evaluating predictors of in-hospital mortality. Odds ratios (ORs) with 95% confidence intervals are shown for all included variables; the SAPS II score was the only independent predictor of mortality. Abbreviations: CNS, central nervous system; SAPS II, Simplified Acute Physiology Score II; SOFA, Sequential Organ Failure Assessment; GCS, Glasgow Coma Scale.
