# Supplementary material for: Clinical differences and prognostic factors for unfavourable outcome in community-acquired versus health care-associated intracranial empyema and abscess
Source: Research Square preprint supplement (doi:10.21203/rs.3.rs-8357670/v1), 2026-01-13
Supplement: Supplementary file 1 [file 03894b4305dcf32fc5985a01.docx]

**Table S1.** Microbiological pathogens identified in intracranial empyema and brain abscess.

| HCA (n=76) |  | CA (n=76) |  |
| --- | --- | --- | --- |
| Pathogen | n (%) | Pathogen | n (%) |
| *Staphylococcus aureus* | 19 (25.0%) | *Streptococcus anginosus* group (including *S. constellatus*) | 21 (27.6%) |
| *Cutibacterium acnes* | 15 (19.7%) | *Parvimonas micra* | 6 (7.9%) |
| *Staphylococcus epidermidis* | 10 (13.2%) | *Aggregatibacter aphrophilus* | 6 (7.9%) |
| *Proteus mirabilis* | 7 (9.2%) | *Staphylococcus epidermidis* | 5 (6.6%) |
| *Klebsiella aerogenes* | 6 (7.9%) | Anaerobic mixed flora | 4 (5.3%) |
| *Enterobacter cloacae* complex | 2 (2.6%) | *Prevotella intermedia* | 2 (2.6%) |
| *Citrobacter koseri* | 2 (2.6%) | *Actinomyces odontolyticus* | 2 (2.6%) |
| *Pseudomonas aeruginosa* | 2 (2.6%) | *Actinomyces meyeri* | 1 (1.3%) |
| *Morganella morganii* | 1 (1.3%) | *Actinomyces turicensis* | 1 (1.3%) |
| *Serratia marcescens* | 1 (1.3%) | *Actinotignum schaalii* | 1 (1.3%) |
| *Dermabacter hominis* | 1 (1.3%) | *Porphyromonas gingivalis* | 1 (1.3%) |
| *Staphylococcus caprae/capitis* | 1 (1.3%) | *Bacteroides fragilis* | 1 (1.3%) |
| *Staphylococcus hominis* | 1 (1.3%) | *Peptoniphilus* spp. | 1 (1.3%) |
| *Escherichia coli* | 1 (1.3%) | *Campylobacter gracilis* | 1 (1.3%) |
| *Nocardia beijingensis* | 1 (1.3%) | *Corynebacterium amycolatum* | 1 (1.3%) |
| *Finegoldia magna* | 1 (1.3%) | *Trueperella bernardiae* | 1 (1.3%) |
| *Streptococcus anginosus* | 1 (1.3%) | *Klebsiella pneumoniae* | 1 (1.3%) |
| *Parvimonas micra* | 1 (1.3%) | *Achromobacter xylosoxidans* | 1 (1.3%) |
| *Streptococcus* spp., not further specified | 1 (1.3%) | *Gemella morbillorum* | 1 (1.3%) |
| Coagulase-negative staphylococci, not differentiated | 2 (2.6%) | *Cladosporium* spp. | 1 (1.3%) |
| No pathogen identified | 1 (1.3%) | *Streptococcus pyogenes* | 1 (1.3%) |
|  |  | *Streptococcus intermedius* | 1 (1.3%) |
|  |  | *Streptococcus pneumoniae* | 2 (2.6%) |
|  |  | *Streptococcus* spp., not further specified | 1 (1.3%) |
|  |  | *Aspergillus fumigatus* | 1 (1.3%) |
|  |  | *Aspergillus* spp., not further specified | 1 (1.3%) |
|  |  | *Mycoplasma faucium* | 1 (1.3%) |
|  |  | *Toxoplasma gondii* | 1 (1.3%) |
|  |  | Coagulase-negative staphylococci, not differentiated | 1 (1.3%) |
|  |  | No pathogen identified | 1 (1.3%) |

This table summarizes all microbiologically identified pathogens isolated from patients with intracranial empyema or brain abscess, stratified by community-acquired (CA) and health care-associated (HCA) infections. Pathogens are reported based on microbiological cultures obtained from intracranial specimens, cerebrospinal fluid, blood cultures, or other relevant clinical samples. Patients with polymicrobial infections are counted for each isolated organism. *n* refers to the number of pathogens rather than the number of patients; polymicrobial infections were classified into all corresponding pathogen categories. Percentages refer to the proportion within each group.
