# Supplementary material for: Clinical differences and prognostic factors for unfavourable outcome in community-acquired versus health care-associated intracranial empyema and abscess
Source: Research Square preprint supplement (doi:10.21203/rs.3.rs-8357670/v1), 2026-01-13
Supplement: Supplementary file 2 [file 77ebea7358dcdb6db52e6887.docx]

**Table S4.** Univariable logistic regression for predictors of unfavourable outcome at discharge.

| Variable | OR | CI lower | CI upper | p value |
| --- | --- | --- | --- | --- |
| Age | 1.001 | 0.971 | 1.032 | 0.935 |
| Female | 0.704 | 0.235 | 2.108 | 0.53 |
| CA vs. HCA infections | 1.321 | 0.464 | 3.762 | 0.602 |
| Total CCI | 1.055 | 0.881 | 1.263 | 0.563 |
| GCS on day of diagnosis | 0.597 | 0.415 | 0.861 | 0.006 |
| Sepsis | 5.238 | 1.727 | 15.886 | **0.003** |

Univariable logistic regression analysis of predictors of unfavourable outcome at discharge, defined as a Glasgow Outcome Scale–Extended (GOSE) score ≤ 4. Each variable was analysed in a separate logistic regression model. Results are presented as odds ratios (ORs) with 95% confidence intervals (CIs). Abbreviations: CA, community-acquired; HCA, health care–associated; CCI, Charlson Comorbidity Index; GCS, Glasgow Coma Scale.
