# Supplementary material for: Clinical differences and prognostic factors for unfavourable outcome in community-acquired versus health care-associated intracranial empyema and abscess
Source: Research Square preprint supplement (doi:10.21203/rs.3.rs-8357670/v1), 2026-01-13
Supplement: Supplementary file 2 [file 995e998551fe81f7d1163f2c.pdf]

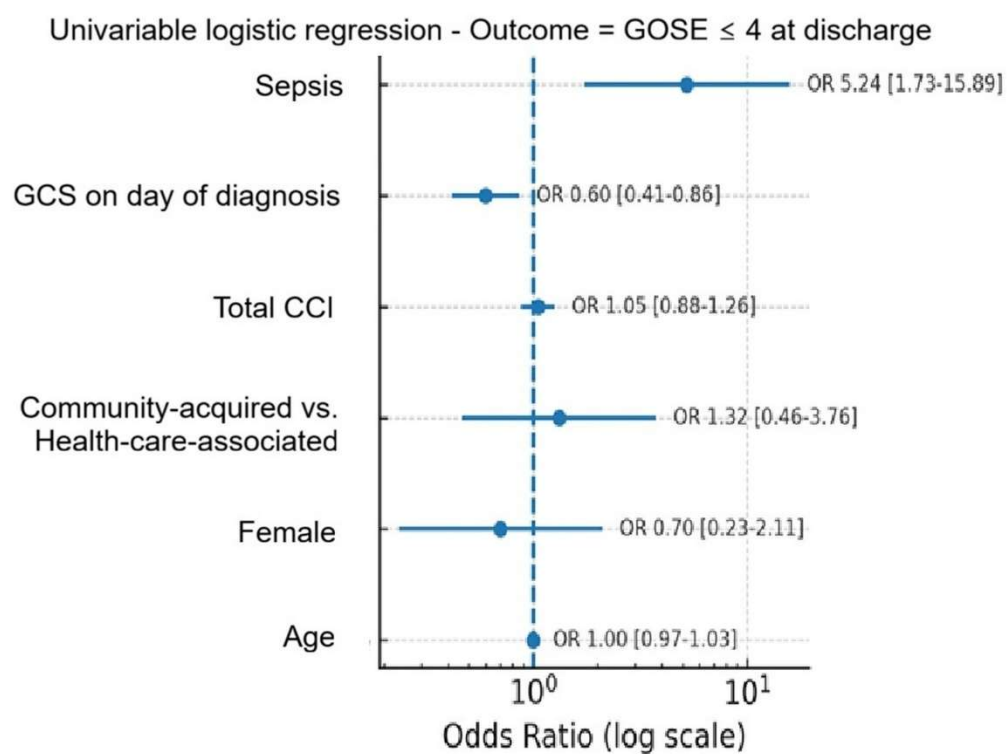

**Fig. S1** Univariable logistic regression analysis of predictors of unfavourable outcome (GOSE  $\leq$  4) at discharge. Odds ratios (ORs) with 95% confidence intervals are presented for each predictor assessed in separate logistic regression models. Abbreviations: GOSE, Glasgow Outcome Scale–Extended score; CCI, Charlson Comorbidity Index; GCS, Glasgow Coma Scale.
