# Supplementary material for: Clinical differences and prognostic factors for unfavourable outcome in community-acquired versus health care-associated intracranial empyema and abscess
Source: Research Square preprint supplement (doi:10.21203/rs.3.rs-8357670/v1), 2026-01-13
Supplement: Supplementary file 3 [file bd08e247d10997450f593539.docx]

**Table S5.** Multivariable logistic regression analysis of predictors of in-hospital mortality in patients with intracranial empyema and abscess.

| Predictor | B (Estimate) | Standard error | OR | p value | 95% CI (OR) |
| --- | --- | --- | --- | --- | --- |
| Fever | 1.476 | 0.925 | 4.38 | 0.111 | [0.71 – 26.82] |
| Headache | 0.8 | 0.963 | 2.23 | 0.406 | [0.34 –14.69] |
| Disturbance of consciousness | -1.347 | 1.422 | 0.26 | 0.344 | [0.02 – 4.22] |
| CNS symptoms | -0.801 | 0.929 | 0.45 | 0.389 | [0.07 – 2.77] |
| Malaise | 0.518 | 1.074 | 1.68 | 0.629 | [0.20 – 13.78] |
| Seizures | 0.038 | 1.005 | 1.04 | 0.970 | [0.14 – 7.45] |
| Preexisting infectious disease | 0.355 | 1.100 | 1.43 | 0.747 | [0.17 – 12.32] |
| Age (per year) | -0.017 | 0.032 | 0.98 | 0.589 | [0.92 – 1.05] |
| SAPS II score (per point) | 0.179 | 0.068 | 1.20 | **0.009** | **[1.05 – 1.37]** |
| SOFA score | -0.113 | 0.319 | 0.89 | 0.724 | [0.48 – 1.67] |
| Sex (Female) | -0.591 | 0.815 | 0.55 | 0.469 | [0.11 – 2.74] |
| GCS on day of diagnosis | 0.202 | 0.296 | 1.22 | 0.495 | [0.69 – 2.19] |

Results are presented as regression coefficients (B), odds ratios (OR), and 95% confidence intervals (CI). Variables were entered simultaneously into the multivariable logistic regression model. SAPS II score was the only independent predictor of in-hospital mortality. Abbreviations: CNS, central nervous system; SAPS II, Simplified Acute Physiology Score II; SOFA, Sequential Organ Failure Assessment; GCS, Glasgow Coma Scale.
