# Supplementary material for: Clinical differences and prognostic factors for unfavourable outcome in community-acquired versus health care-associated intracranial empyema and abscess
Source: Research Square preprint supplement (doi:10.21203/rs.3.rs-8357670/v1), 2026-01-13
Supplement: Supplementary file 4 [file c8dfa03c78ed2db199266c70.docx]

**Table S2.** Classification of pathogens in community-acquired and health care-associated intracranial empyema and abscess.

| Category |  | HCA (n=76) |
| --- | --- | --- |
| n (%) | Pathogens included |
| Gram-positive cocci | 34 (44.7%) | *Staphylococcus aureus*, *Staphylococcus epidermidis*, *Staphylococcus caprae/capitis*, *Staphylococcus hominis*, *Streptococcus anginosus*, *Streptococcus* spp., coagulase-negative staphylococci |
| Gram-positive rods | 17 (22.4%) | *Cutibacterium acnes*, *Dermabacter hominis* |
| Gram-negative rods | 22 (28.9%) | *Proteus mirabilis*, *Klebsiella aerogenes*, *Enterobacter cloacae* complex, *Citrobacter koseri*, *Pseudomonas aeruginosa*, *Morganella morganii*, *Escherichia coli*, *Serratia marcescens* |
| Obligate anaerobes | 2 (2.6%) | *Finegoldia magna*, *Parvimonas micra* |
| Mycoplasma | 0 | — |
| Fungi | 0 | — |
| Parasites | 0 | — |
| No pathogen identified | 1 (1.3%) | — |
| Category |  | CA (n=76) |
| n (%) | Pathogens included |
| Gram-positive cocci | 38 (50.0%) | *Streptococcus anginosus* group, *S. constellatus*, *S. pyogenes*, *S. intermedius*, *S. pneumoniae*, *Staphylococcus epidermidis*, *Gemella morbillorum*, *Streptococcus spp.* |
| Gram-positive rods | 6 (7.9%) | *Actinomyces* spp., *Actinotignum schaalii*, *Corynebacterium amycolatum*, *Trueperella bernardiae* |
| Gram-negative rods | 12 (15.8%) | *Campylobacter gracilis*, *Klebsiella pneumoniae*, *Achromobacter xylosoxidans*, *Porphyromonas gingivalis*, *Bacteroides fragilis*, *Prevotella intermedia* |
| Obligate anaerobes | 14 (18.4%) | *Parvimonas micra*, anaerobic mixed flora, *Peptoniphilus* spp. |
| Mycoplasma | 1 (1.3%) | *Mycoplasma faucium* |
| Fungi | 3 (3.9%) | *Aspergillus fumigatus*, *Aspergillus* spp., *Cladosporium* spp. |
| Parasites | 1 (1.3%) | *Toxoplasma gondii* |
| No pathogen identified | 1 (1.3%) | — |

This table presents the classification of isolated pathogens identified in patients with intracranial empyema or brain abscess, stratified by community-acquired (CA) and health care-associated (HCA) infections. Pathogens were grouped according to microbiological characteristics into Gram-positive cocci, Gram-positive rods, Gram-negative rods, obligate anaerobes, *Mycoplasma* spp., fungi, and parasites. Cases with no pathogen identified include patients with negative microbiological results despite clinical and radiological evidence of intracranial infection. Polymicrobial infections were classified into all corresponding pathogen categories. *n* refers to the number of pathogens rather than the number of patients; polymicrobial infections were classified into all corresponding pathogen categories. Percentages refer to the proportion within each subgroup.
