# Supplementary material for: Clinical differences and prognostic factors for unfavourable outcome in community-acquired versus health care-associated intracranial empyema and abscess
Source: Research Square preprint supplement (doi:10.21203/rs.3.rs-8357670/v1), 2026-01-13
Supplement: Supplementary file 5 [file f6386478e46c2b4eacf86b89.docx]

**Table S3.** Empirical antibiotic regimens and treatment duration in intracranial empyema and abscess.

|  | Intracranial empyema/abscess (n=84) | | | | | | |
| --- | --- | --- | --- | --- | --- | --- | --- |
| HCA (n=47) | | | CA (n=37) | | | |
| N (%) | Median (IQR) | Mean (SD) | N (%) | Median (IQR) | Mean (SD) | *p-value* |
| Ceftriaxone + Metronidazole | 1 (2.1) |  |  | 35 (94.6) |  |  | <0.001 |
| Meropenem | 1 (2.1) |  |  | 4 (10.8) |  |  | 0.164 |
| Ceftazidime + Vancomycin | 37 (78.7) |  |  | 3 (8.1) |  |  | <0.001 |
| Meropenem + Vancomycin | 11 (23.4) |  |  | 3 (8.1) |  |  | 0.080 |
| Additional Rifampicin | 6 (12.8) |  |  | 3 (8.1) |  |  | 0.725 |
| Empirical therapy days |  | 6 (4.0-7.0) | 6 (±2.7) |  | 6 (4.0-7.0) | 6.4 (±3.7) | 0.964 |
| Targeted therapy days |  | 42 (42-42) | 42.7 (±13.6) |  | 42 (42-47) | 51.3 (±29.3) | 0.086 |
| Total antibiotic therapy days |  | 47 (45-49) | 48.7 (±13.9) |  | 49 (46-52) | 57.8 (±29.7) | 0.080 |
|  | | | | | | | |

Empirical antibiotic regimens and treatment duration in patients with community-acquired (CA) and health care-associated (HCA) intracranial empyema/abscess. Data are presented as number (percentage), mean ± standard deviation (SD), or median with interquartile range (IQR), as appropriate. Group comparisons were performed using Fisher’s exact test for categorical variables and Mann–Whitney U test for continuous variables, according to data distribution.
